# Supplementary material for: The solution state and dissolution process of cellulose in ionic-liquid-based solvents with different hydrogen-bonding basicity and microstructures
Source: Royal Society of Chemistry journal article supplement (doi:10.1039/d2gc00374k), 2022-01-01
Supplement: d2gc00374k1.pdf [file d2gc00374k1.pdf]

## Supplementary Information

### **Solution state and dissolution process of cellulose in ionic liquids-based solvents with different hydrogen-bonding basicity and microstructure**

Yan Zhou<sup>1,2</sup>, Xiaocheng Zhang<sup>1</sup>, Dongxiao Yin<sup>3</sup>, Jinming Zhang<sup>1,\*</sup>, Qinyong Mi<sup>1</sup>, Hongchao Lu<sup>1</sup>,

Dehai Liang<sup>3,\*</sup>, Jun Zhang<sup>1,2,\*</sup>

<sup>1</sup> CAS Key Laboratory of Engineering Plastics and CAS Research/Education Center for Excellence in Molecular Sciences, Institute of Chemistry, Chinese Academy of Sciences, Beijing 100190, China

<sup>2</sup> College of Chemistry, University of Chinese Academy of Sciences, Beijing 100049, P. R. China

<sup>3</sup> Beijing National Laboratory for Molecular Sciences and the Key Laboratory of Polymer Chemistry and Physics of Ministry of Education, College of Chemistry and Molecular Engineering, Peking University, Beijing 100871, China

#### **Supporting information content**

Number of pages: 8

Number of figures: 9

Number of tables: 2

\* Corresponding authors.

*E-mail address:* zhjm@iccas.ac.cn (J.M. Zhang); [dliang@pku.edu.cn](mailto:dliang@pku.edu.cn) (D.H. Liang); jzhang@iccas.ac.cn (J. Zhang).

*Mailing address:* Zhongguancun North First Street 2, 100190 Beijing, PR China

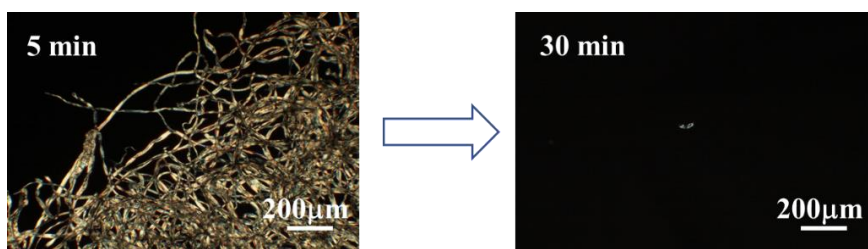

**Fig. S1** Polarized photos of cellulose dissolution in BmimAc/DMAc (1:9, w/w).

|      |                            |   |   |   |   |   |                            |   |   |   |   |   |
|------|----------------------------|---|---|---|---|---|----------------------------|---|---|---|---|---|
| DMSO | +                          | + | + | + | + | + | +                          | + | + | + | + | + |
| DMF  | +                          | + | + | + | + | + | +                          | + | + | + | + | ± |
| DMAc | +                          | + | + | + | + | + | +                          | + | + | + | + | ± |
| DMI  | +                          | + | + | + | + | + | +                          | + | + | + | + | ± |
|      | BmimAc 5:5 4:6 3:7 2:8 1:9 |   |   |   |   |   | EmimAc 5:5 4:6 3:7 2:8 1:9 |   |   |   |   |   |

**Mass ratio of IL/co-solvent**

**Fig. S2** Solubility of cellulose in different acetate-based ILs/co-solvent systems by directly dissolving cellulose in ILs/co-solvent systems. (+, soluble; ±, partially soluble)

|      |                            |   |   |   |   |   |                            |   |   |   |   |   |
|------|----------------------------|---|---|---|---|---|----------------------------|---|---|---|---|---|
| DMSO | +                          | + | + | + | + | + | +                          | + | + | + | - | - |
| DMF  | +                          | + | + | + | + | - | +                          | + | + | + | - | - |
| DMAc | +                          | + | + | ± | - | - | +                          | + | + | + | - | - |
| DMI  | +                          | + | + | ± | - | - | +                          | + | + | + | - | - |
|      | AmimCl 5:5 4:6 3:7 2:8 1:9 |   |   |   |   |   | BmimCl 5:5 4:6 3:7 2:8 1:9 |   |   |   |   |   |

**Mass ratio of IL/co-solvent**

**Fig. S3** Solubility of cellulose in different chloride-based ILs/co-solvent systems by adding co-solvents into cellulose/ILs solutions. (+, homogeneous solution; ±, partial precipitation; -, complete precipitation)

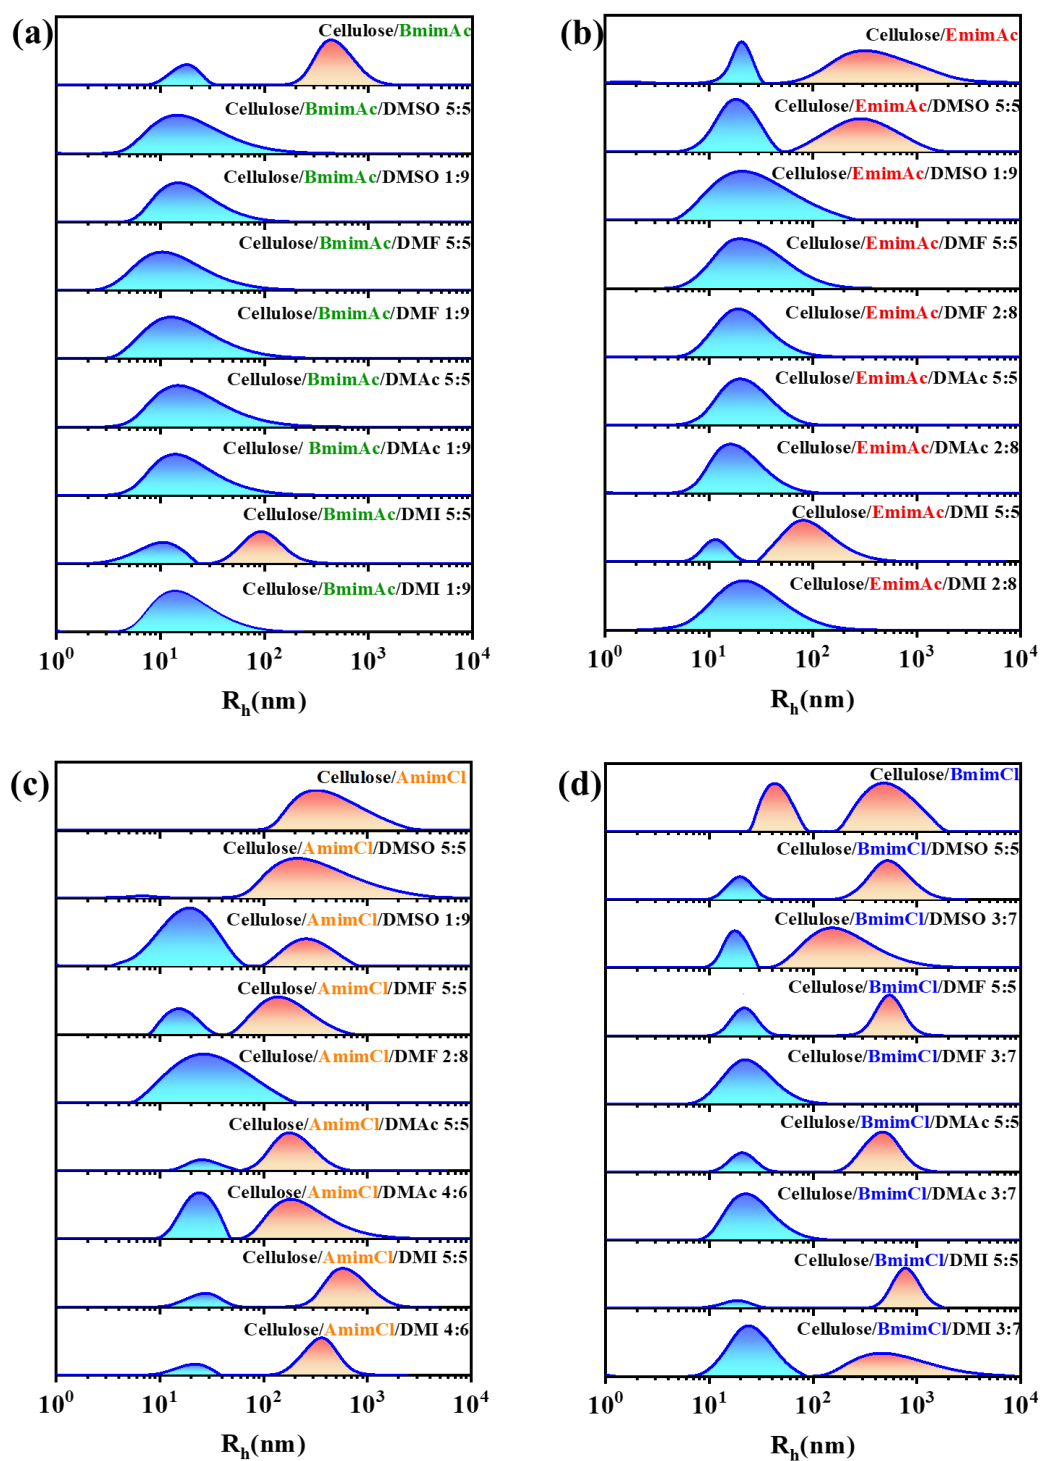

**Fig. S4** The  $R_h$  distribution curves of different cellulose/ILs/co-solvent systems, (a) cellulose/BmimAc/co-solvents, (b) cellulose/EmimAc/co-solvents, (c) cellulose/AmimCl/co-solvents, and (d) cellulose/BmimCl/co-solvents.

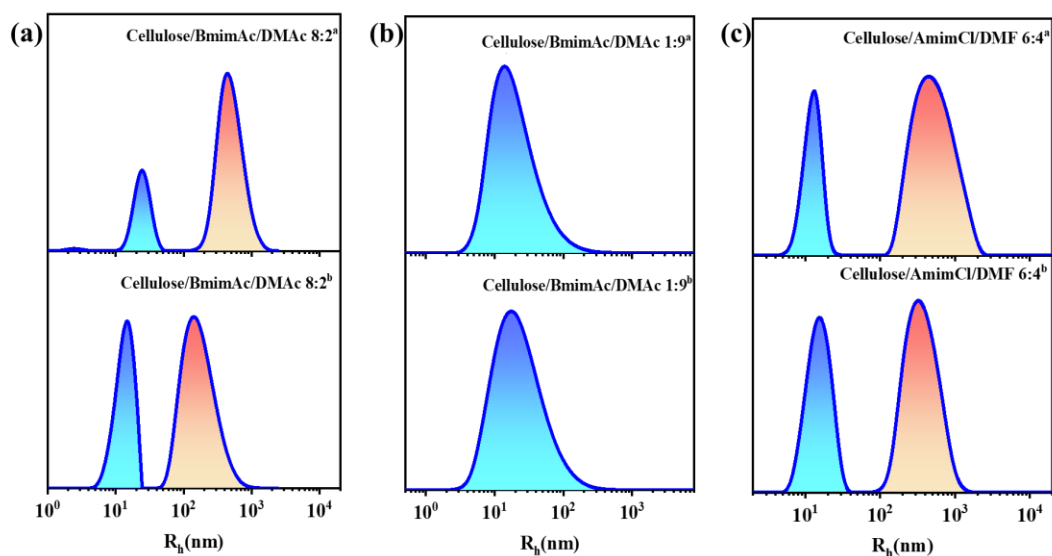

**Fig. S5** Effect of different preparation methods on the solution state of cellulose/ILs/co-solvent systems. (a) Cellulose/BmimAc/DMAc (BmimAc:DMAc, 8:2), (b) cellulose/BmimAc/DMAc (BmimAc:DMAc, 1:9), and (c) cellulose/AmimCl/DMF (AmimCl:DMF, 6:4).

Note: <sup>a</sup> The dissolution method is Method 1 in which the mixture of ILs and co-solvents is used to dissolve cellulose.

<sup>b</sup> The dissolution method is Method 2 in which the ILs dissolve cellulose firstly followed the addition of the co-solvents.

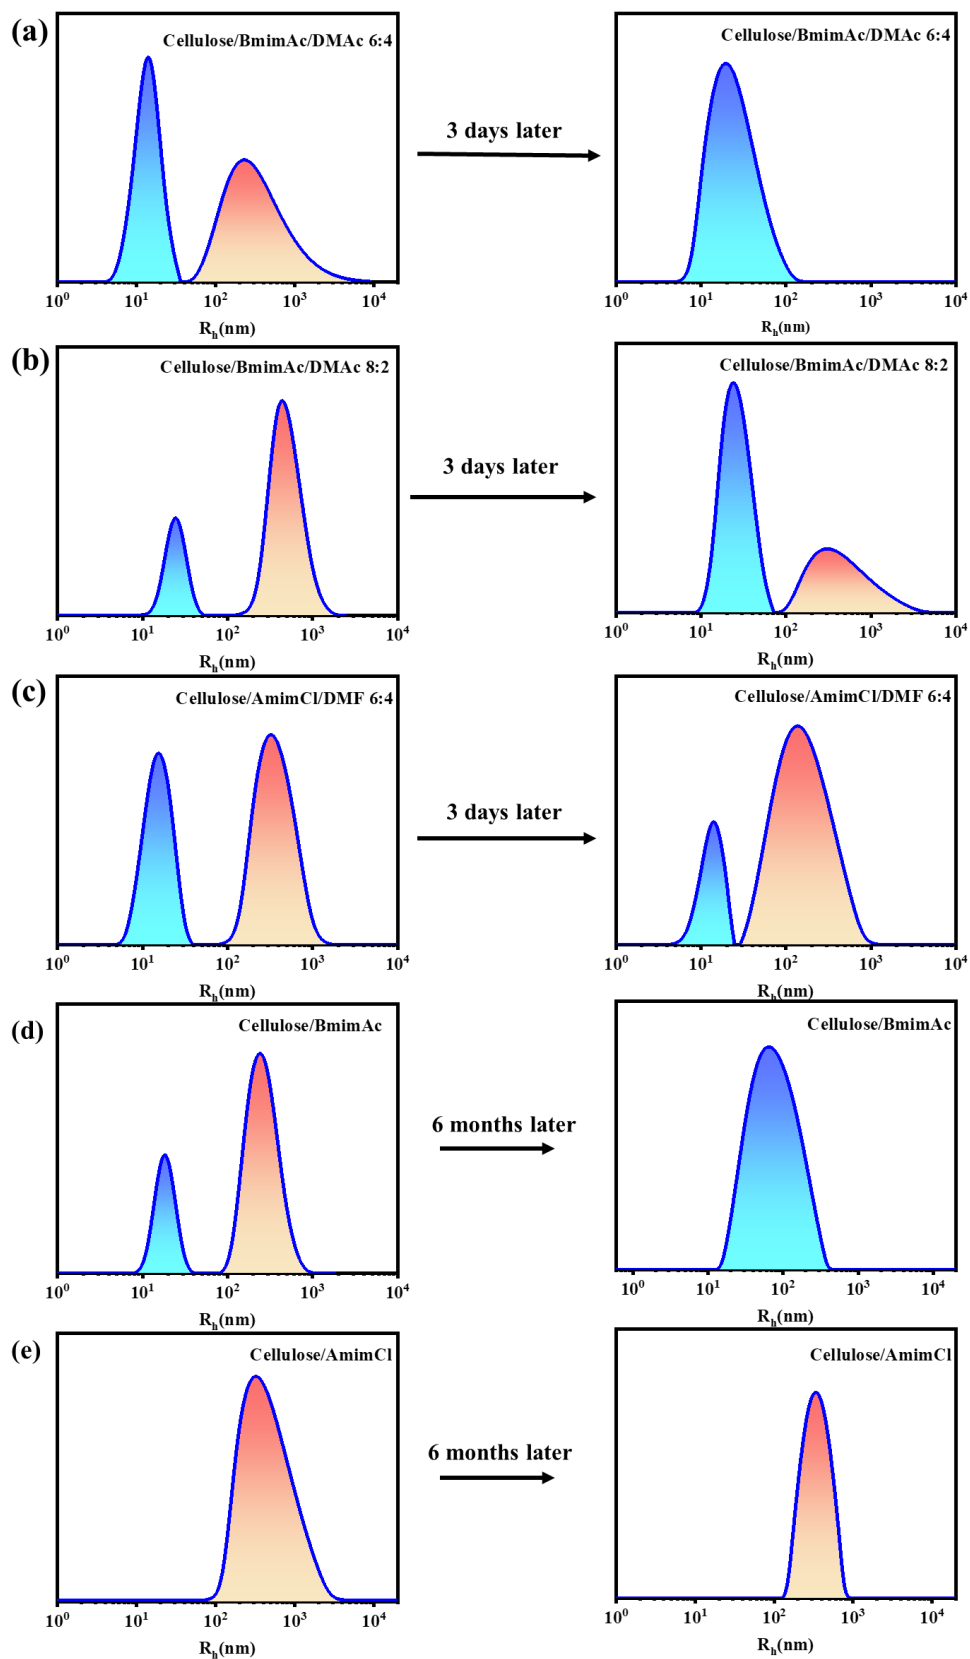

**Fig. S6**  $R_h$  distribution curves of cellulose/ILs and cellulose/ILs/co-solvent solutions before and after placement. (a) Cellulose/BmimAc/DMAc (BmimAc/DMAc, 6:4), (b) cellulose/BmimAc/DMAc (BmimAc/DMAc, 8:2), (c) cellulose/AmimCl/DMF

(AmimCl/DMF, 6:4), (d) cellulose/BmimAc, (e) cellulose/AmimCl.

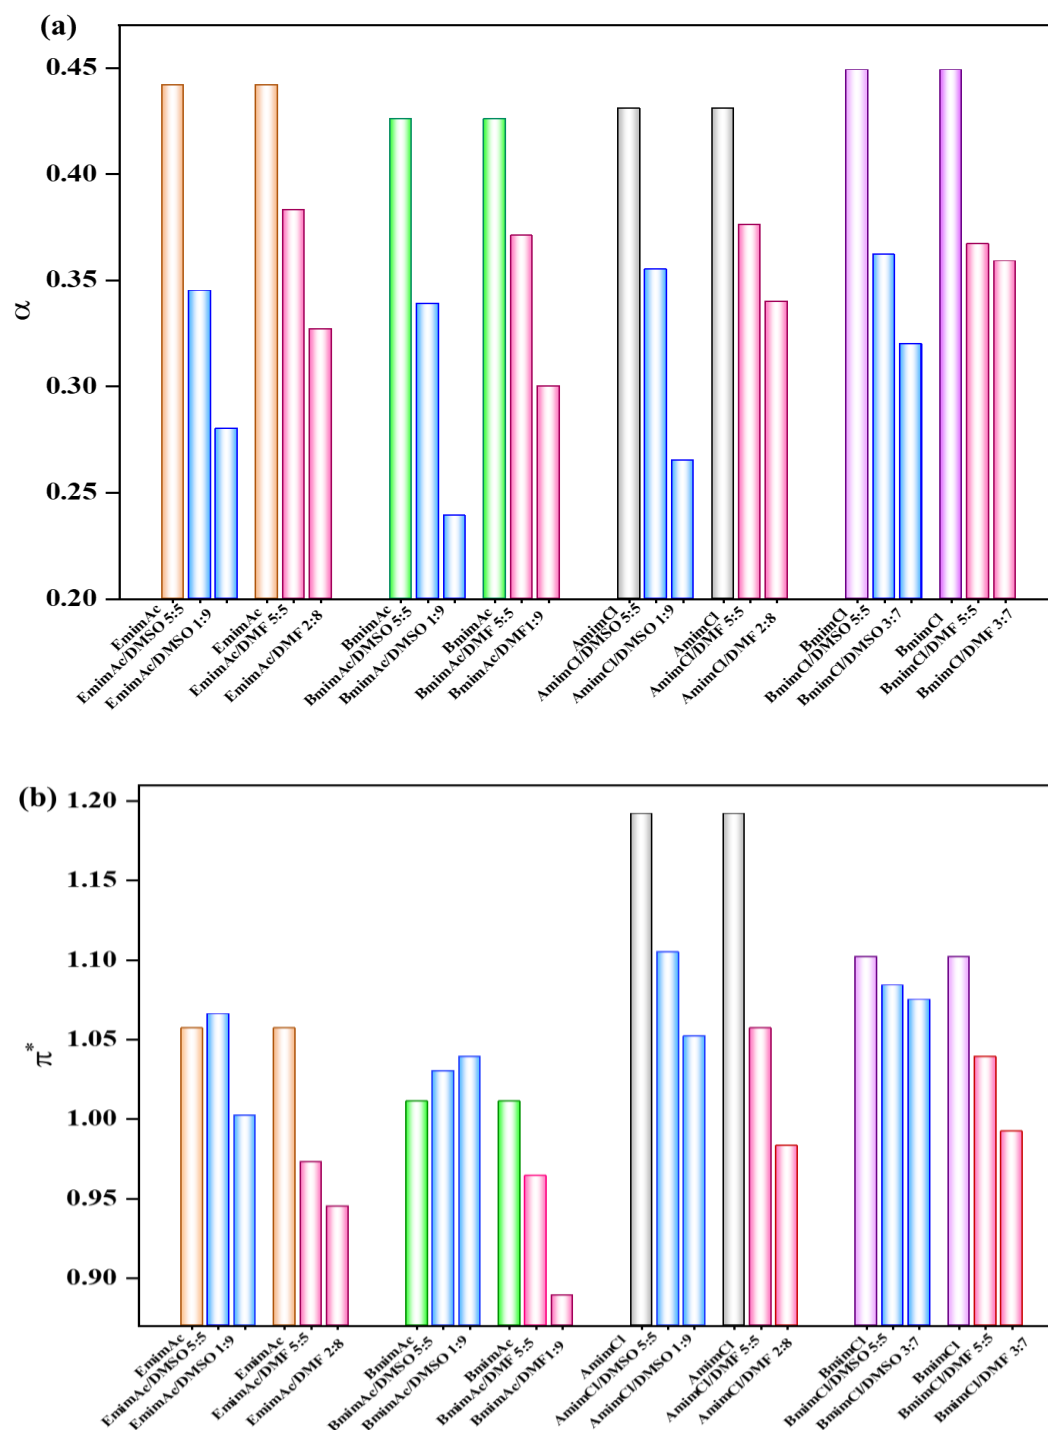

**Fig. S7** Solvent parameters of different ILs/co-solvent systems. (a)  $\alpha$ , (b)  $\pi^*$ .

**Table S1** Viscosity, cation self-diffusion coefficient ( $D_+$ ), anion self-diffusion coefficient ( $D_-$ ), conductivity  $\Lambda_{\text{NMR}}$ , molar conductivity  $\Lambda_{\text{imp}}$  and ion dissociation degree ( $\Lambda_{\text{imp}}/\Lambda_{\text{NMR}}$ ) of BmimAc/DMAc system.

| Solvents        | Viscosity (cP) | $D_+$ ( $\times 10^{-7}$ cm <sup>2</sup> /S) | $D_-$ ( $\times 10^{-7}$ cm <sup>2</sup> /S) | $\Lambda_{\text{NMR}}$ (S-cm <sup>2</sup> /mol) | Conductivity (mS/cm) | $\Lambda_{\text{imp}}$ (S-cm <sup>2</sup> /mol) | $\Lambda_{\text{imp}}/\Lambda_{\text{NMR}}$ |
|-----------------|----------------|----------------------------------------------|----------------------------------------------|-------------------------------------------------|----------------------|-------------------------------------------------|---------------------------------------------|
| BmimAc          | 477.2          | 0.31                                         | 0.31                                         | 0.23                                            | 0.62                 | 0.12                                            | 0.51                                        |
| BmimAc/DMAc 8:2 | 38.44          | 1.81                                         | 1.87                                         | 1.38                                            | 3.12                 | 0.59                                            | 0.42                                        |
| BmimAc/DMAc 7:3 | 18.44          | 3.50                                         | 3.68                                         | 2.70                                            | 4.21                 | 0.79                                            | 0.29                                        |
| BmimAc/DMAc 6:4 | 10.23          | 6.18                                         | 6.59                                         | 4.79                                            | 4.86                 | 0.91                                            | 0.19                                        |
| BmimAc/DMAc 5:5 | 6.16           | 10.0                                         | 10.6                                         | 7.75                                            | 5.35                 | 1.01                                            | 0.13                                        |
| BmimAc/DMAc 4:6 | 3.92           | 15.4                                         | 16.3                                         | 11.9                                            | 5.46                 | 1.03                                            | 0.09                                        |
| BmimAc/DMAc 3:7 | 2.52           | 23.0                                         | 23.4                                         | 17.4                                            | 4.90                 | 0.92                                            | 0.05                                        |
| BmimAc/DMAc 2:8 | 1.72           | 33.0                                         | 33.4                                         | 24.9                                            | 4.07                 | 0.77                                            | 0.04                                        |
| BmimAc/DMAc 1:9 | 1.23           | 47.7                                         | 48.8                                         | 36.2                                            | 3.25                 | 0.61                                            | 0.02                                        |

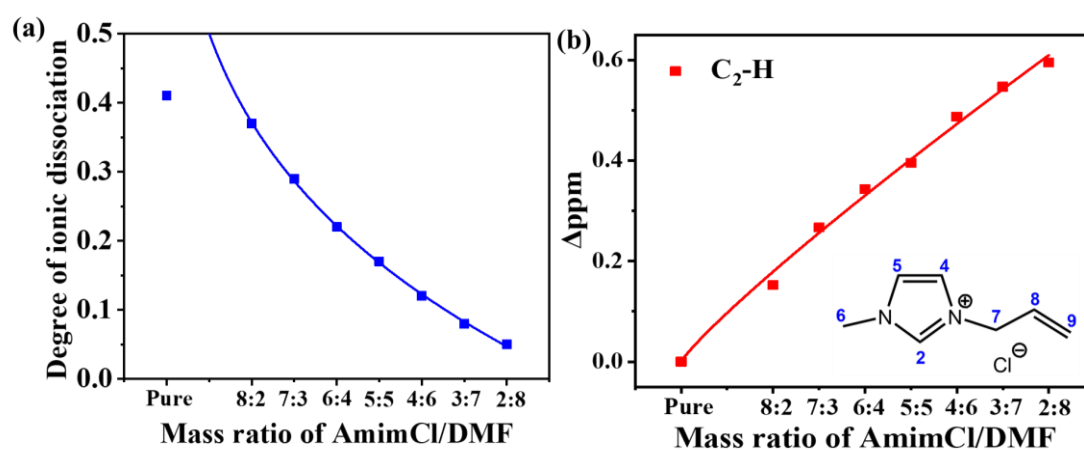

**Fig. S8** Microstructure of the AmimCl/DMF system. (a) Degree of ion dissociation of the AmimCl/DMF system. (b) Chemical shift change of C<sub>2</sub>-H in AmimCl.

**Table S2** Viscosity, cation self-diffusion coefficient ( $D_+$ ), molar conductivity  $\Lambda_{\text{NMR}}$ , molar conductivity  $\Lambda_{\text{imp}}$  and ion dissociation degree ( $\Lambda_{\text{imp}}/\Lambda_{\text{NMR}}$ ) of AmimCl/DMF system.

| Solvents       | Viscosity (cP) | $D_+$ ( $\times 10^{-7}$ cm <sup>2</sup> /S) | $\Lambda_{\text{NMR}}$ (S·cm <sup>2</sup> /mol) | Conductivity (mS/cm) | $\Lambda_{\text{imp}}$ (S·cm <sup>2</sup> /mol) | $\Lambda_{\text{imp}}/\Lambda_{\text{NMR}}$ |
|----------------|----------------|----------------------------------------------|-------------------------------------------------|----------------------|-------------------------------------------------|---------------------------------------------|
| AmimCl         | 2086           | 0.09                                         | 0.07                                            | 0.20                 | 0.03                                            | 0.41                                        |
| AmimCl/DMF 8:2 | 128.7          | 1.13                                         | 0.84                                            | 2.28                 | 0.32                                            | 0.37                                        |
| AmimCl/DMF 7:3 | 50.07          | 2.78                                         | 2.09                                            | 4.35                 | 0.60                                            | 0.29                                        |
| AmimCl/DMF 6:4 | 21.77          | 5.76                                         | 4.32                                            | 7.01                 | 0.96                                            | 0.22                                        |
| AmimCl/DMF 5:5 | 9.23           | 10.4                                         | 7.77                                            | 9.42                 | 1.29                                            | 0.17                                        |
| AmimCl/DMF 4:6 | 4.79           | 17.2                                         | 12.9                                            | 11.2                 | 1.53                                            | 0.12                                        |
| AmimCl/DMF 3:7 | 2.81           | 26.5                                         | 19.8                                            | 11.9                 | 1.63                                            | 0.08                                        |
| AmimCl/DMF 2:8 | 1.69           | 39.6                                         | 29.7                                            | 11.2                 | 1.53                                            | 0.05                                        |

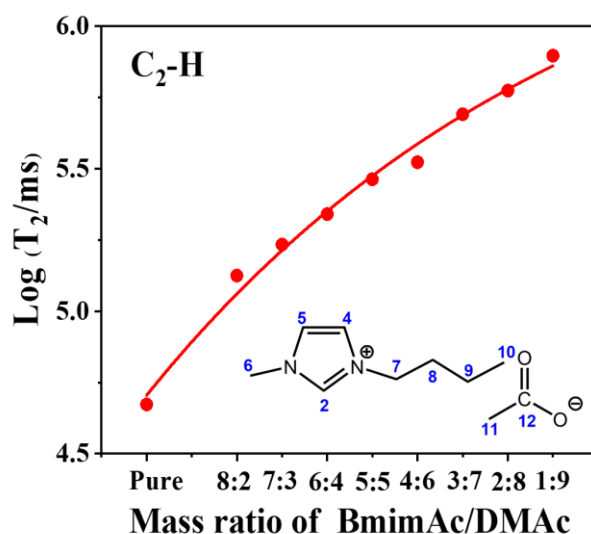

**Fig. S9** Average  $T_2$  values for  $C_2\text{-H}$  in BmimAc of the BmimAc/DMAc system.

## REFERENCES

- (1) Chen, Y., Zhang, Y., Ke, F., Zhou, J., Wang, H., and Liang, D. (2011) Solubility of neutral and charged polymers in ionic liquids studied by laser light scattering. *Polymer*, *52*, 481-488.
- (2) Fukaya, Y., Sugimoto, A., and Ohno, H. (2006) Superior solubility of polysaccharides in low viscosity, polar, and halogen-free 1,3-dialkylimidazolium formates. *Biomacromolecules*, *7*, 3295-3297.
- (3) Nordness, O., and Brennecke, J. F. (2020) Ion Dissociation in Ionic Liquids and Ionic Liquid Solutions. *Chem. Rev.*, *120*, 12873-12902.
